# Supplementary material
Source: PubMed Central journal article supplement (PMC4293730)
Supplement: DS_10.1177_0022034514535214.pdf [file DS_10.1177_0022034514535214.pdf]

S.-I. Lee<sup>1,2†</sup>, G.-T. Kim<sup>3†</sup>, H.J. Kim<sup>2</sup>, S.-H. Park<sup>4</sup>,  
and E.-C. Kim<sup>2\*</sup>

<sup>1</sup>Department of Dental Hygiene, School of Health Science, Dankook University, Cheonan, Republic of Korea; <sup>2</sup>Department of Oral and Maxillofacial Pathology, School of Dentistry and Research Center for Tooth and Periodontal Regeneration (MRC), Kyung Hee University, Seoul, Republic of Korea; <sup>3</sup>Department of Oral and Maxillofacial Radiology, School of Dentistry, Kyung Hee University, Seoul, Republic of Korea; and <sup>4</sup>Department of Conservative Dentistry, School of Dentistry, Kyung Hee University, Seoul, Republic of Korea; <sup>†</sup>authors contributing equally to this work; \*corresponding author, eckim@khu.ac.kr

*J Dent Res* DOI: 10.1177/0022034514535214

## NOD2 Mediates Odontoblast Differentiation and RANKL Expression

### APPENDIX

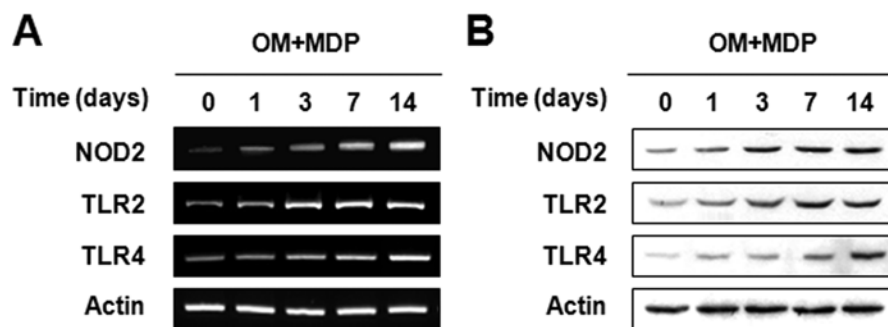

**Appendix Figure.** Muramyl dipeptide (MDP) treatment increased NOD2, TLR2, and TLR4 expression during osteoblast/odontoblast differentiation in human dental pulp cells (HDPCs). HDPCs were cultured with MDP (10  $\mu\text{g}/\text{mL}$ ) for 14 days in osteogenic media (OM) with 10 mM  $\beta$ -glycerophosphate,  $10^{-7}$  M dexamethasone, and 50  $\mu\text{g}/\text{mL}$  L-ascorbic acid. The mRNA and protein expression levels were examined by RT-PCR (A) and Western blot analysis (B). Similar data were obtained from 3 independent experiments.

**Appendix Table.** RT-PCR Primer Lists

| Genes          | Primer Sequence (5'-3')                                                                    | Annealing Temp. (°C) | Cycle Number | Product Size (bp) |
|----------------|--------------------------------------------------------------------------------------------|----------------------|--------------|-------------------|
| ALP            | F : 5'-ACFTFFCTAAFAATFTCATC-3'<br>R : 5'-CTFFTAFFCFATFCCTTA-3'                             | 55                   | 30           | 475               |
| OPN            | F : 5'-CCAAGTAAGTCCAACGAAAG-3'<br>R : 5'-GGTGATGTCCTCGTCTGTA-3'                            | 55                   | 30           | 347               |
| OCN            | F : 5'-CATGAGAGCCCCTCACA-3'<br>R : 5'-AGAGCGACACCCTAGAC-3'                                 | 57                   | 30           | 310               |
| DMP-1          | F : 5'-CAGGAGCACAGGAAAAGGAG-3'<br>R : 5'-CTGGTGGTATCTTCCCCCAGGAG-3'                        | 56                   | 36           | 213               |
| DSPP           | F : 5'-AGAAGGACCTGGCCAAAAAT-3'<br>R : 5'-TCTCTCGGCTACTGCTGT-3'                             | 60                   | 35           | 280               |
| RANKL          | F : 5'-CCAGCATCAAATCCAAGT-3'<br>R : 5'-CCCCTTCAGATGATCCTTC-3'                              | 56                   | 35           | 605               |
| OPG            | F : 5'-TGCAGTACGTCAAGCAGGAG -3'<br>R : 5'-TGACCTCTGTGAAAACAGC-3'                           | 60                   | 35           | 481               |
| M-CSF          | F : 5'-ATGACAGACAGGTGGAAGTCCAGTGTAGAGG -3'<br>R : 5'-TCACACAACCTCAGTAGGTTACAGGTGA TGGGC-3' | 60                   | 35           | 437               |
| TNF- $\alpha$  | F : 5'-CTCTFFCCCAFFCAFTCAGA-3'<br>R : 5'-GGCGTTTGGGAAGGTTGGAT-3'                           | 60                   | 35           | 519               |
| IL-1 $\beta$   | F : 5'-TGGAGATGACAGTTCAGAAG-3'<br>R : 5'-GTAAGTGGTCCGTTTATGC-3'                            | 60                   | 35           | 288               |
| IL-6           | F : 5'-TAFCCGCCCCACACAGACAG-3'<br>R : 5'-GGCTGGCATTGTGGTTGGG-3'                            | 60                   | 35           | 408               |
| IL-11          | F : 5'-GCAGCGGACAGGGAAGGGTAAA-3'<br>R : 5'-TGTGCGACTCAGCGGGGTCTG-3'                        | 59                   | 32           | 176               |
| IL-17          | F : 5'-CGATGACTCCTGGGAAGACCTC-3'<br>R : 5'-GTGTGGGCTCCCCAGAGCTCTTA-3'                      | 55                   | 25           | 524               |
| NOD2           | F : 5'-CAGAAGGCCGAGCCGCACAA-3'<br>R : 5'-CCAGACACCAGCGGGCACAG-3'                           | 60                   | 35           | 145               |
| TLR2           | F : 5'-GTGGCCAGCAGGTTCAAGATG-3'<br>R : 5'-AGGACTTATCGCAGCTCTCAG-3'                         | 55                   | 641          | 35                |
| TLR4           | F : 5'-AAGTGTCTGAACTCCCTCCAGG-3'<br>R : 5'-ATGGTCTTATTCATCTGACAGGTGATA-3'                  | 55                   | 278          | 35                |
| $\beta$ -actin | F : 5'-CATGGATGATGATATCGCCGCG-3'<br>R : 5'-ACATGATCTGGGTGATCTTCTCG-3'                      | 55                   | 35           | 471               |
